# Supplementary material
Source: PubMed Central journal article supplement (PMC6599625)

Supplemental Figure 1 | Uncropped scans with size marker indications.

Ext Data Fig. 4d

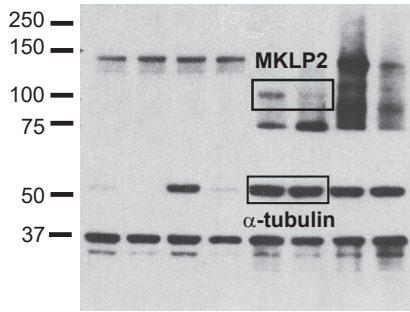

Ext Data Fig. 5c

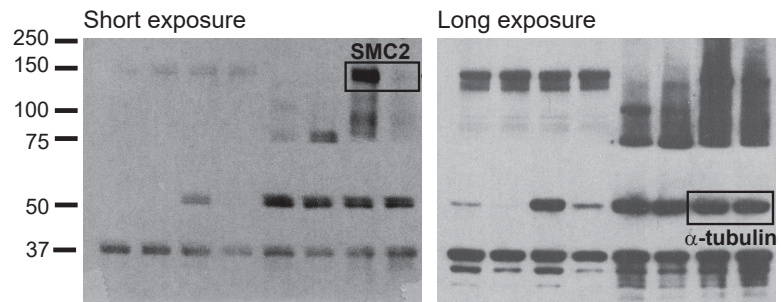

Ext Data Fig. 7a

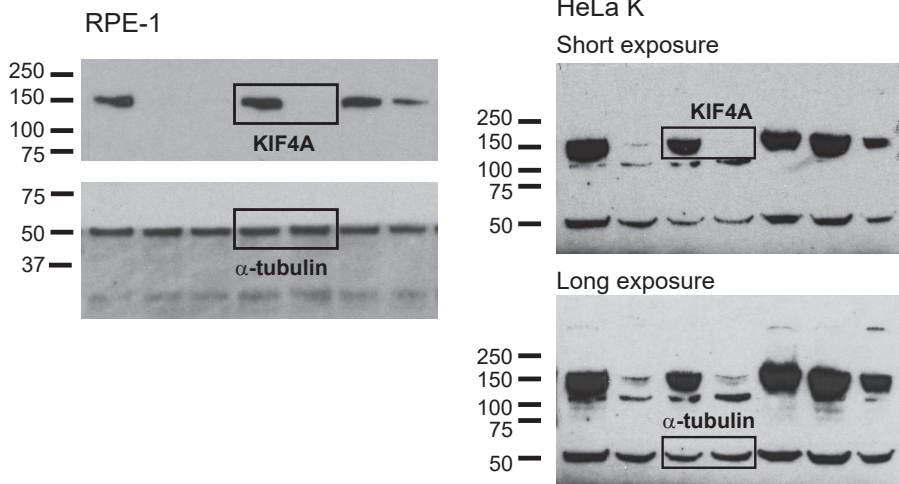

Ext Data Fig. 9a

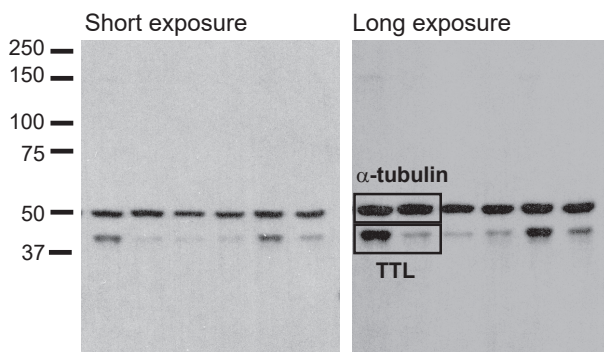

Supplement: NIHMS1502962-supplement-1.pdf [file NIHMS1502962-supplement-1.pdf]
